# Supplementary material for: Impairment of Glucose Metabolism and Suppression of Stemness in MCF-7/SC Human Breast Cancer Stem Cells by Nootkatone
Source: MDPI journal article supplement (doi:10.3390/pharmaceutics14050906), 2022-04-21
Supplement: s1 [file s1]

Article

# Supplementary Materials: Impairment of Glucose Metabolism and Suppression of Stemness in MCF-7/SC Human Breast Cancer Stem Cells by Nootkatone

Yen Thi-Kim Nguyen, Ngoc Bao To, Vi Nguyen-Phuong Truong, Hee Young Kim, Meran Keshawa Ediriweera, Yoongho Lim and Somi Kim Cho

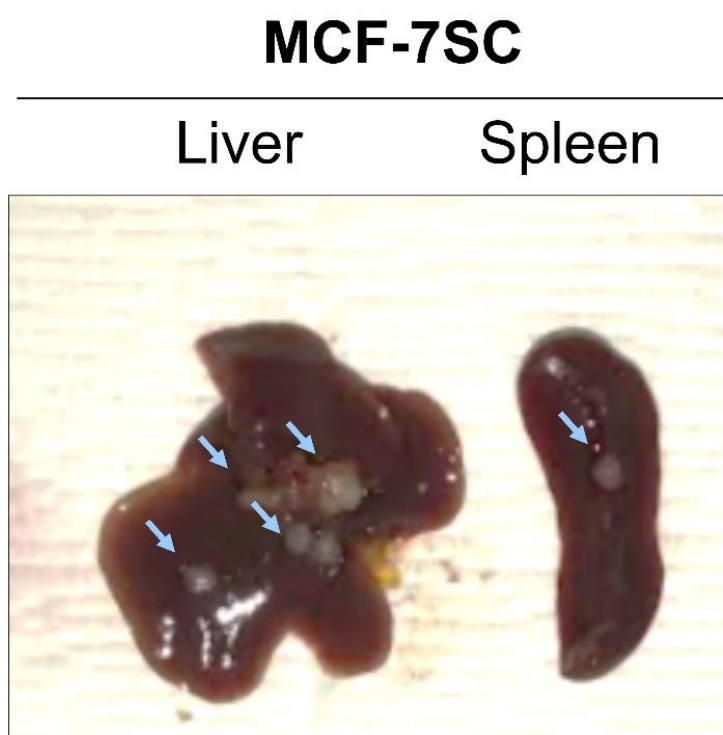

**Figure S1.** Metastasized tumors from BALB/C nude mice injected with MCF-7SCs (light blue arrows; to liver and spleen).

A

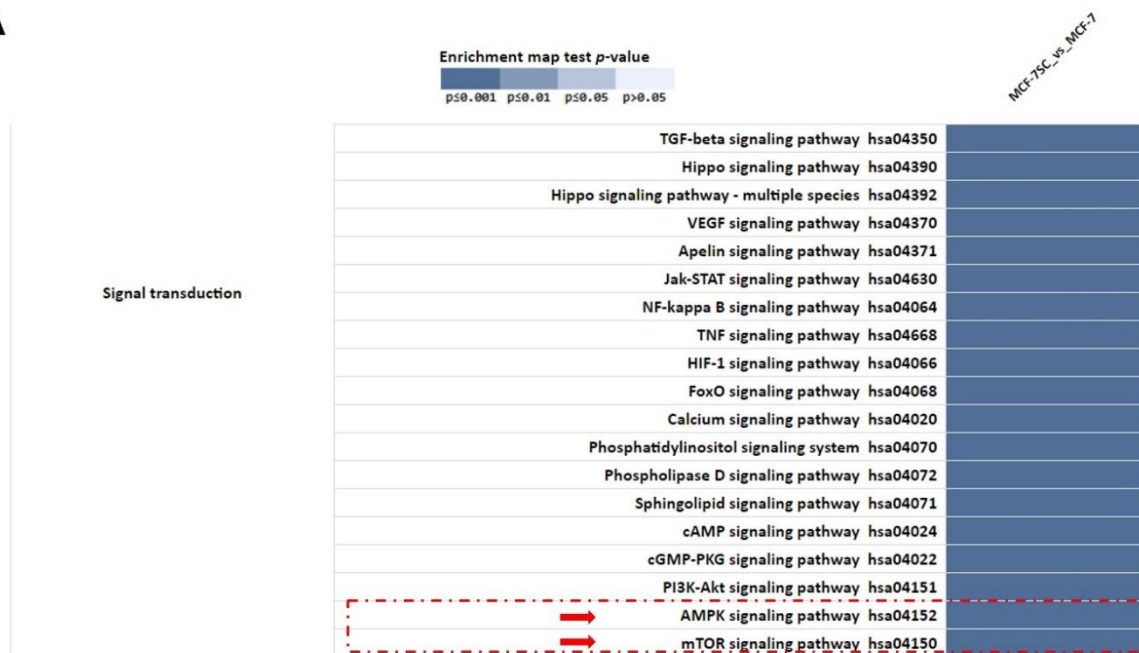

B

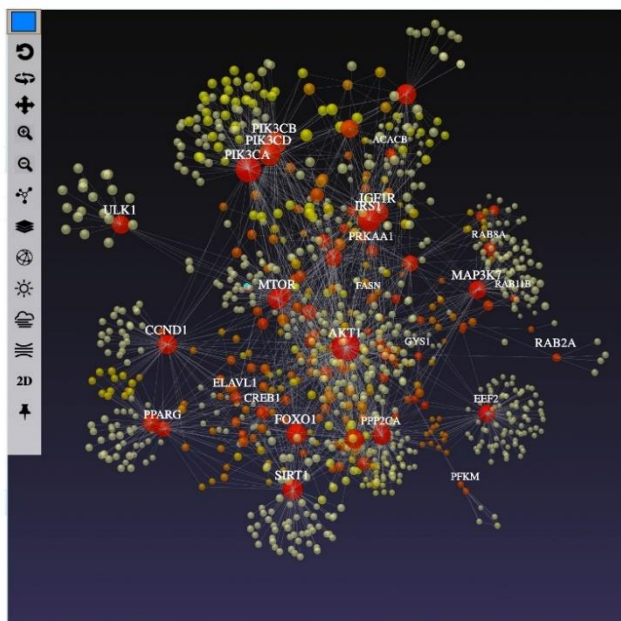

C

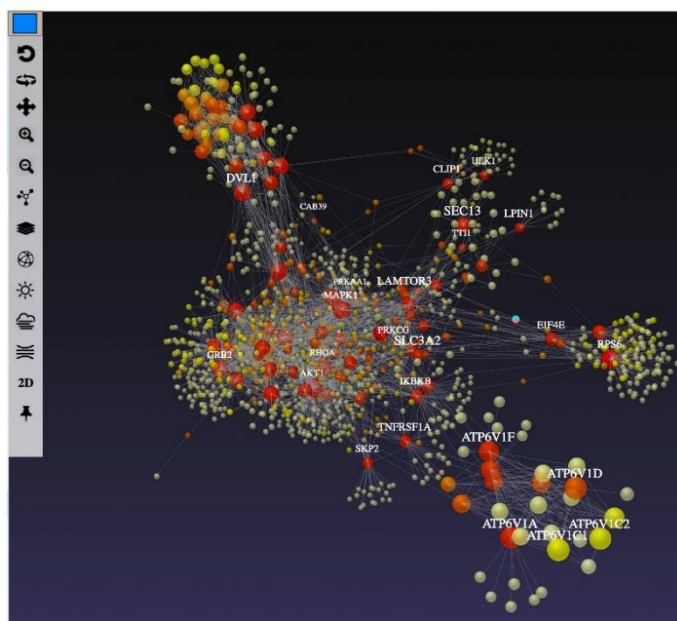

**Figure S2.** The AMPK/mTOR signaling pathway is enriched in MCF-7SCs. (A) KEGG pathways determined by transcriptomic analysis. (B) Enrichment of the AMPK and (C) mTOR signaling pathways analyzed using the NetworkAnalyst tool.

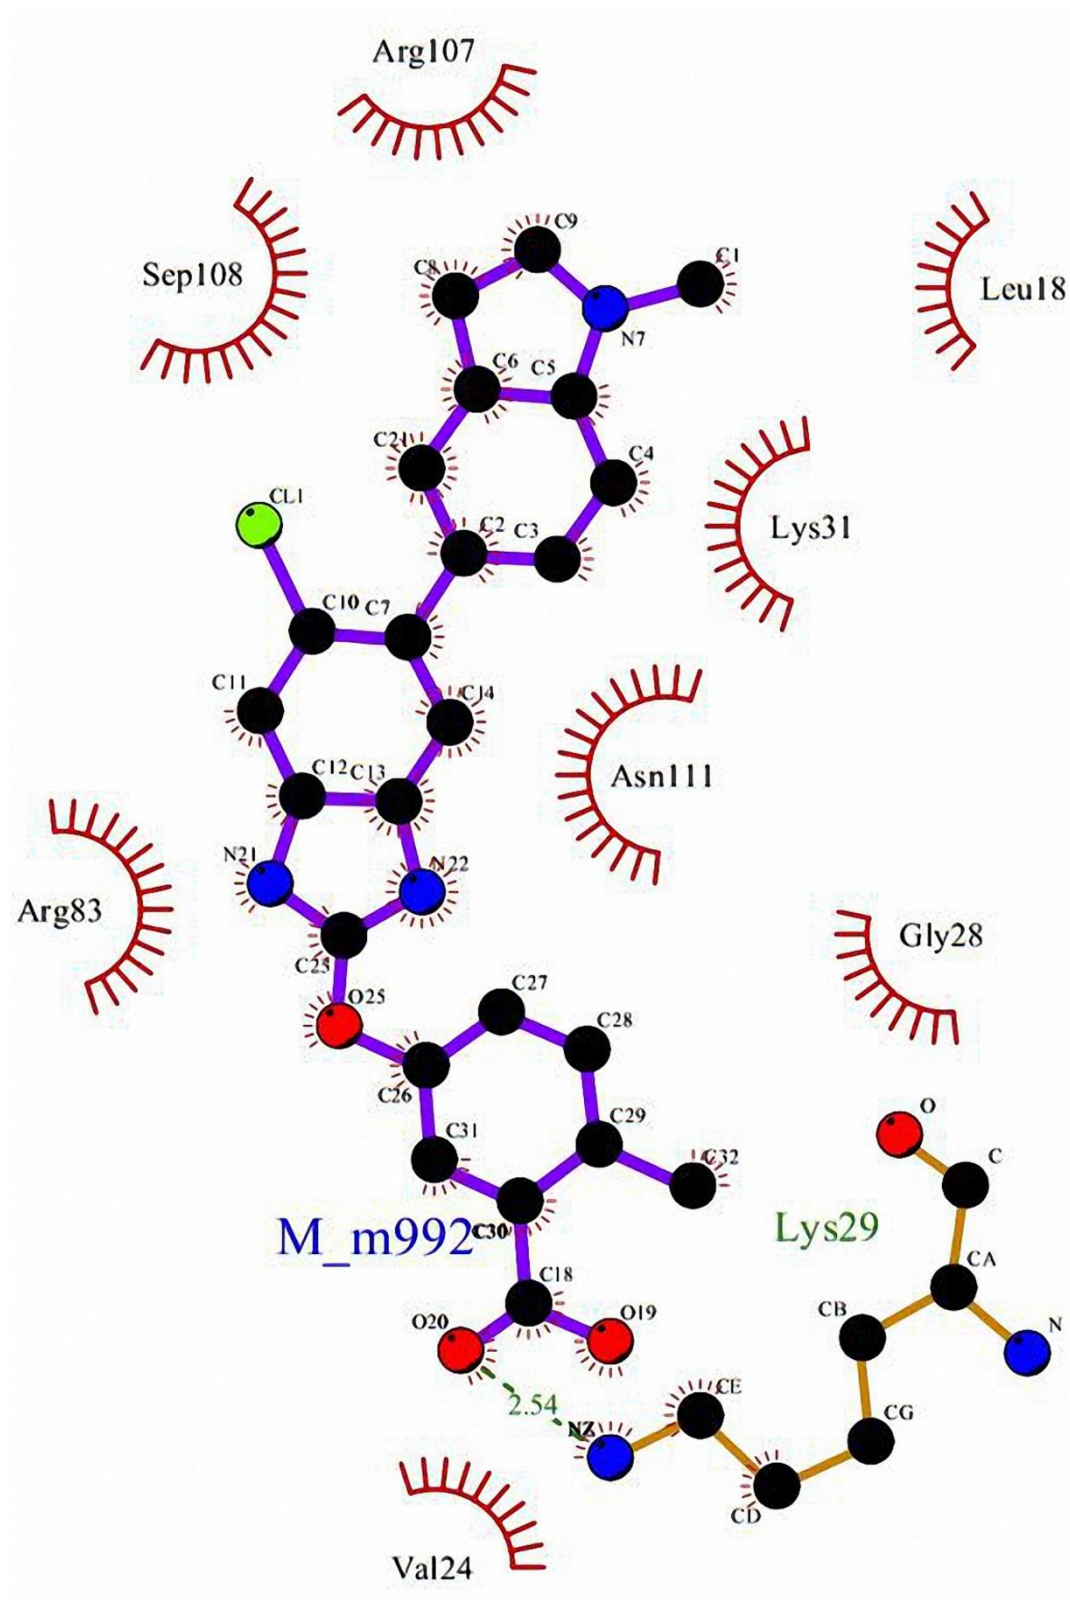

**Figure S3.** Interactions between 992 contained in 4cfe.pdb and AMPK analyzed using the LigPlot program.

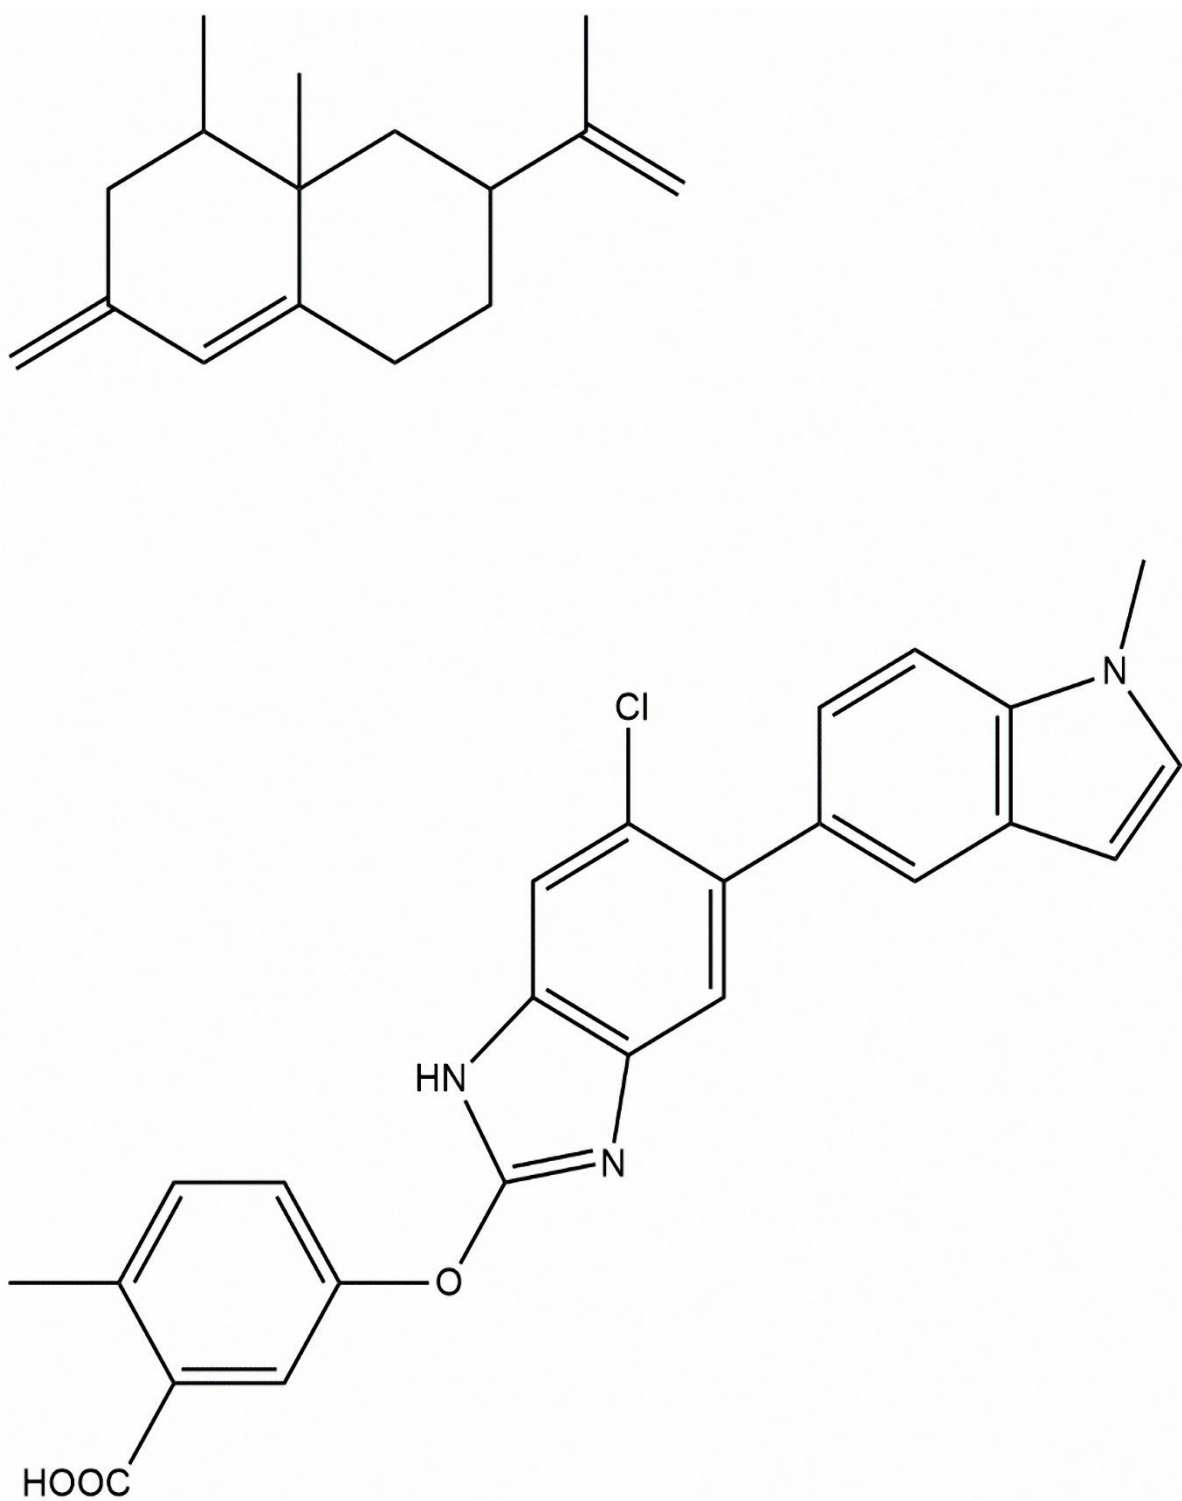

**Figure S4.** The structures of nootkatone (top) and 5-((6-chloro-5-(1-methyl-1H-indol-5-yl)-1H-benzo[d]imidazol-2-yl)oxy)-2-methylbenzoic acid (named as 992) (bottom).

**Table S1.** Sequences of RT-qPCR primers

| Genes   |                 | Primer sequences         |
|---------|-----------------|--------------------------|
| ALDH3B1 | Forward (5'→3') | TGCTATGTGGATGACAACTGCG   |
|         | Reverse (5'→3') | CGTGTGATGGCATTCTGTAGGG   |
| GALM    | Forward (5'→3') | CAACCGAATCGCCAAAGGAACC   |
|         | Reverse (5'→3') | CGAGAACTGGACGCCATTTGAC   |
| ALDH1L2 | Forward (5'→3') | GCCTGGTCTCGTTACCAA       |
|         | Reverse (5'→3') | GCCACTTTCACCTCTTCAGC     |
| PGM1    | Forward (5'→3') | TGATGGACGCGAGCAAACCTGTC  |
|         | Reverse (5'→3') | ATGTCCTCCACACTCTGCTTGC   |
| ALDH1A3 | Forward (5'→3') | GCCCTTTATCTCGGCTCTCT     |
|         | Reverse (5'→3') | CGGTGAAGGCGATCTTGT       |
| ALDOC   | Forward (5'→3') | AAATTGGGGTGGAACACACA     |
|         | Reverse (5'→3') | AGAAAATGACGCCTCCAATG     |
| LDHA    | Forward (5'→3') | TGGGAGTTCACCCATTAAGC     |
|         | Reverse (5'→3') | AGCACTCTCAACCACCTGCT     |
| BPGM    | Forward (5'→3') | GGAAATAGCAGTAGGGCACTCC   |
|         | Reverse (5'→3') | CAACAGCACGCAGGTTTTTCATCC |
| ALDH9A1 | Forward (5'→3') | AGCTGAAGACGGTGTGTGTG     |
|         | Reverse (5'→3') | CCCAAAGCCTGGATGTAAGA     |
| ALDH3A2 | Forward (5'→3') | ACTGATAGGAGCCATCGCTGCA   |
|         | Reverse (5'→3') | GCTCCGTGGTTTCCTCAACACC   |
| ACSS2   | Forward (5'→3') | CGAGGCCCTGCAGAAGTGTC     |
|         | Reverse (5'→3') | GAGTCACCCATGCCGAGCTC     |
| PGAM1   | Forward (5'→3') | GGAGGGGAAACGTGTACTGA     |
|         | Reverse (5'→3') | CAGAGAGACCCTCCAGATGC     |
| PGAM4   | Forward (5'→3') | CGCTACGAGATGCTGGCTATGA   |
|         | Reverse (5'→3') | CCATAGTGCCGCTCATTGAGGC   |
| ALDOA   | Forward (5'→3') | GCACTCTACCAGAAGGCGGAT    |
|         | Reverse (5'→3') | GGTGGTAGTCTCGCCATTTGTC   |
| ALDH1B1 | Forward (5'→3') | CTGGAGCTGGGTGGTAAGAG     |
|         | Reverse (5'→3') | CTTTCTCCACGGTTCTCTCG     |
| ALDH7A1 | Forward (5'→3') | CAACGAGCCAATAGCAAGAG     |
|         | Reverse (5'→3') | GCATCGCCAATCTGTCTTAC     |
| PGAM5   | Forward (5'→3') | GAACTACATCCACCGAGCTGA    |
|         | Reverse (5'→3') | GGGAAACTGCAACGCTCTAC     |
| HK2     | Forward (5'→3') | AAGGCTTCAAGGCATCTG       |
|         | Reverse (5'→3') | CCACAGGTCATCATAGTTCC     |
| PCK2    | Forward (5'→3') | TAGTGCCTGTGGCAAGACCAAC   |
|         | Reverse (5'→3') | GAAGCCGTTCTCAGGGTTGATG   |
| PGM2    | Forward (5'→3') | CGGATGCTGATAGACTTGCTGTG  |
|         | Reverse (5'→3') | TGAGAGCACTGCGATCCTGGTT   |

|         |                 |                          |
|---------|-----------------|--------------------------|
| HK1     | Forward (5'→3') | GGTGAAATCGTCCGCAAC       |
|         | Reverse (5'→3') | CCCGGGTCTTCATCGTC        |
| ACSS1   | Forward (5'→3') | ATGGGCAGTGAGGACATGCTCT   |
|         | Reverse (5'→3') | CACAGCCAAAGATGTCACCTGG   |
| FBP1    | Forward (5'→3') | TCAACTGCTTCATGCTGGAC     |
|         | Reverse (5'→3') | GGGTCAAAGTCCTTGGCATA     |
| GLUT1   | Forward (5'→3') | GCTTCCTGCTCATCAATCGTAA   |
|         | Reverse (5'→3') | CGACCCCTCTTCTTTTCATCTCCT |
| PKM2    | Forward (5'→3') | ATCGTCCTCACCAAGTCTGG     |
|         | Reverse (5'→3') | GAAGATGCCACGGTACAGGT     |
| PGM1    | Forward (5'→3') | AGCATTCCGTATTTCCAGCAG    |
|         | Reverse (5'→3') | GCCAGTTGGGGTCTCATACAAA   |
| ATP5G3  | Forward (5'→3') | GGATTTGCCTTGTCTGAAGC     |
|         | Reverse (5'→3') | CGTACATTCCCATGACACCA     |
| COXAI1  | Forward (5'→3') | ACGAGCTCATGAAAGTGTTGTG   |
|         | Reverse (5'→3') | AATGCGATACAACTCGACTTTCTC |
| COX5B   | Forward (5'→3') | CAGAAGGGACTGGACCCATA     |
|         | Reverse (5'→3') | TTCACAGATGCAGCCCACTA     |
| NDUFA10 | Forward (5'→3') | CACCTGCGATTACTGGTTCAG    |
|         | Reverse (5'→3') | GCAGCTCTCTGAACTGATGTA    |
| PGC1α   | Forward (5'→3') | TGCTAAACGACTCCGAGAA      |
|         | Reverse (5'→3') | TGCAAAGTTCCTCTCTGCT      |
